# Supplementary material for: Sustained correction of hippocampal neurogenic and cognitive deficits after a brief treatment by Nutlin-3 in a mouse model of fragile X syndrome
Source: Springer Nature journal article supplement (doi:10.1186/s12916-022-02370-9), 2022-05-12

# Differential expression analysis (DESeq2)

## Input dataset

```
library("DESeq2")
library("biomaRt") #example code for mouse gene id mapping

rm(list=c(""))
setwd("~/Desktop/Walsman/Xinyu/counts/")

## Read dataset
counts= as.matrix(read.csv("../read_count.csv",row.names = 1))

condition = c("Vehicle","Vehicle","Vehicle",
             "Nutlin_3","Nutlin_3","Nutlin_3",
             "Nutlin_3","Nutlin_3","Nutlin_3")
type = c("wildtype","wildtype","wildtype",
        "knock_out","knock_out","knock_out",
        "wildtype","wildtype","wildtype",
        "knock_out","knock_out","knock_out")
condition = factor(condition,levels = c("Vehicle", "Nutlin_3"))
type = factor(type,levels = c("wildtype","knock_out"))
coldata = data.frame(type = type, condition = condition, row.names = colnames(counts))

#ensembl.genes=row.names(counts)
#ensembl = useMart("ensembl", dataset = "mmusculus_gene_ensembl")
#genesmap <- getBM(attributes = c("ensembl_gene_id", "mgi_symbol", "external_gene_name"), filters = "ensembl_gene_id", values =ensembl.genes, mart = ensembl)
#counts=counts[ensembl.genes[!is.na(genesmap$ensembl_gene_id)],]
#rownames(counts)=genesmap$external_gene_name
#counts["Fmr1",]
```

```
counts=counts[rowSums(counts) > 20,]
dds <- DESeqDataSetFromMatrix(countData = counts,
                              coldata = coldata,
                              design = ~ condition + type + condition:type)
```

## Detect DE genes between KO\_Vehicle and KO\_Nutlin3

```
subset1_idx=(as.character(type=="knock_out"))
dds_1 <- DESeqDataSetFromMatrix(countData = counts[,subset1_idx],
                                coldata = coldata[,subset1_idx],
                                design = ~ condition)

dds_1 <- DESeq(dds_1)
res_1 <- results(dds_1)
summary(res_1) #up: 1.5%, down: 0.036%
```

```
## out of 22583 with nonzero total read count
## adjusted p-value < 0.1
## LFC > 0 (up) : 337, 1.5%
## LFC < 0 (down) : 8, 0.035%
## outliers [1] : 17, 0.075%
## low counts [2] : 4379, 19%
## (mean count < 8)
## [1] see 'cooksCutoff' argument of ?results
## [2] see 'independentFiltering' argument of ?results
```

```
# Result is stored in "resOrdered1"
resOrdered1=res_1[order(res_1$padj),]
#write.csv(as.data.frame(resOrdered1), file="Veh_vs_Nut(KO).csv") # this line is to write result into .csv file
#resLFC_1 <- lfcShrink(dds_1, coef="condition_Nutlin_3_vs_Vehicle", type="apeglm")

# check the first 5 lines of result
head(resOrdered1)
```

```
## log2 fold change (MLE): condition Nutlin 3 vs Vehicle
## Wald test p-value: condition Nutlin 3 vs Vehicle
## DataFrame with 6 rows and 6 columns
## baseMean log2FoldChange lfcSE stat pvalue
## <numeric> <numeric> <numeric> <numeric> <numeric>
## ENSMUSG0000029843 355.277 2.74431 0.202111 13.57825 5.39018e-42
## ENSMUSG00000095562 108.846 -6.00510 0.506700 -11.85140 2.11620e-32
## ENSMUSG0000039004 281.669 1.92368 0.165399 11.63054 2.88365e-31
## ENSMUSG000004105 125.551 2.23619 0.234225 9.54719 1.33262e-21
## ENSMUSG0000022150 260.800 1.50927 0.158172 9.54197 1.40150e-21
## ENSMUSG0000057969 150.693 2.61724 0.285023 9.18255 4.20997e-20
```

```
## padj
## <numeric>
## ENSMUSG0000029843 9.80312e-38
## ENSMUSG00000095562 1.92437e-28
## ENSMUSG0000039004 1.47475e-27
## ENSMUSG000004105 5.09782e-18
## ENSMUSG0000022150 5.09782e-18
## ENSMUSG0000057969 1.27611e-16
```

```
plot(res_1$log2FoldChange, -log10(res_1$padj),pch=20,
      xlim = c(-5,10), ylim=c(0,15),
      xlab = "log2FoldChange",
      ylab = "-log10(FDR)")

#with(subset(res_1, padj<0.05 & abs(log2FoldChange)>2), points(log2FoldChange, -log10(padj), pch=20, col="red", cex=0.5))
with(subset(res_1, padj<0.05), points(log2FoldChange, -log10(padj), pch=20, col="red", cex=0.5))

#Add lines for absolute FC>2 and FDR <0.05
abline(v=0, col="black", lty=3, lwd=1.0)
abline(v=-2, col="black", lty=4, lwd=2.0)
abline(v=2, col="black", lty=4, lwd=2.0)
abline(h=-log10(0.05), col="black", lty=4, lwd=2.0)
```

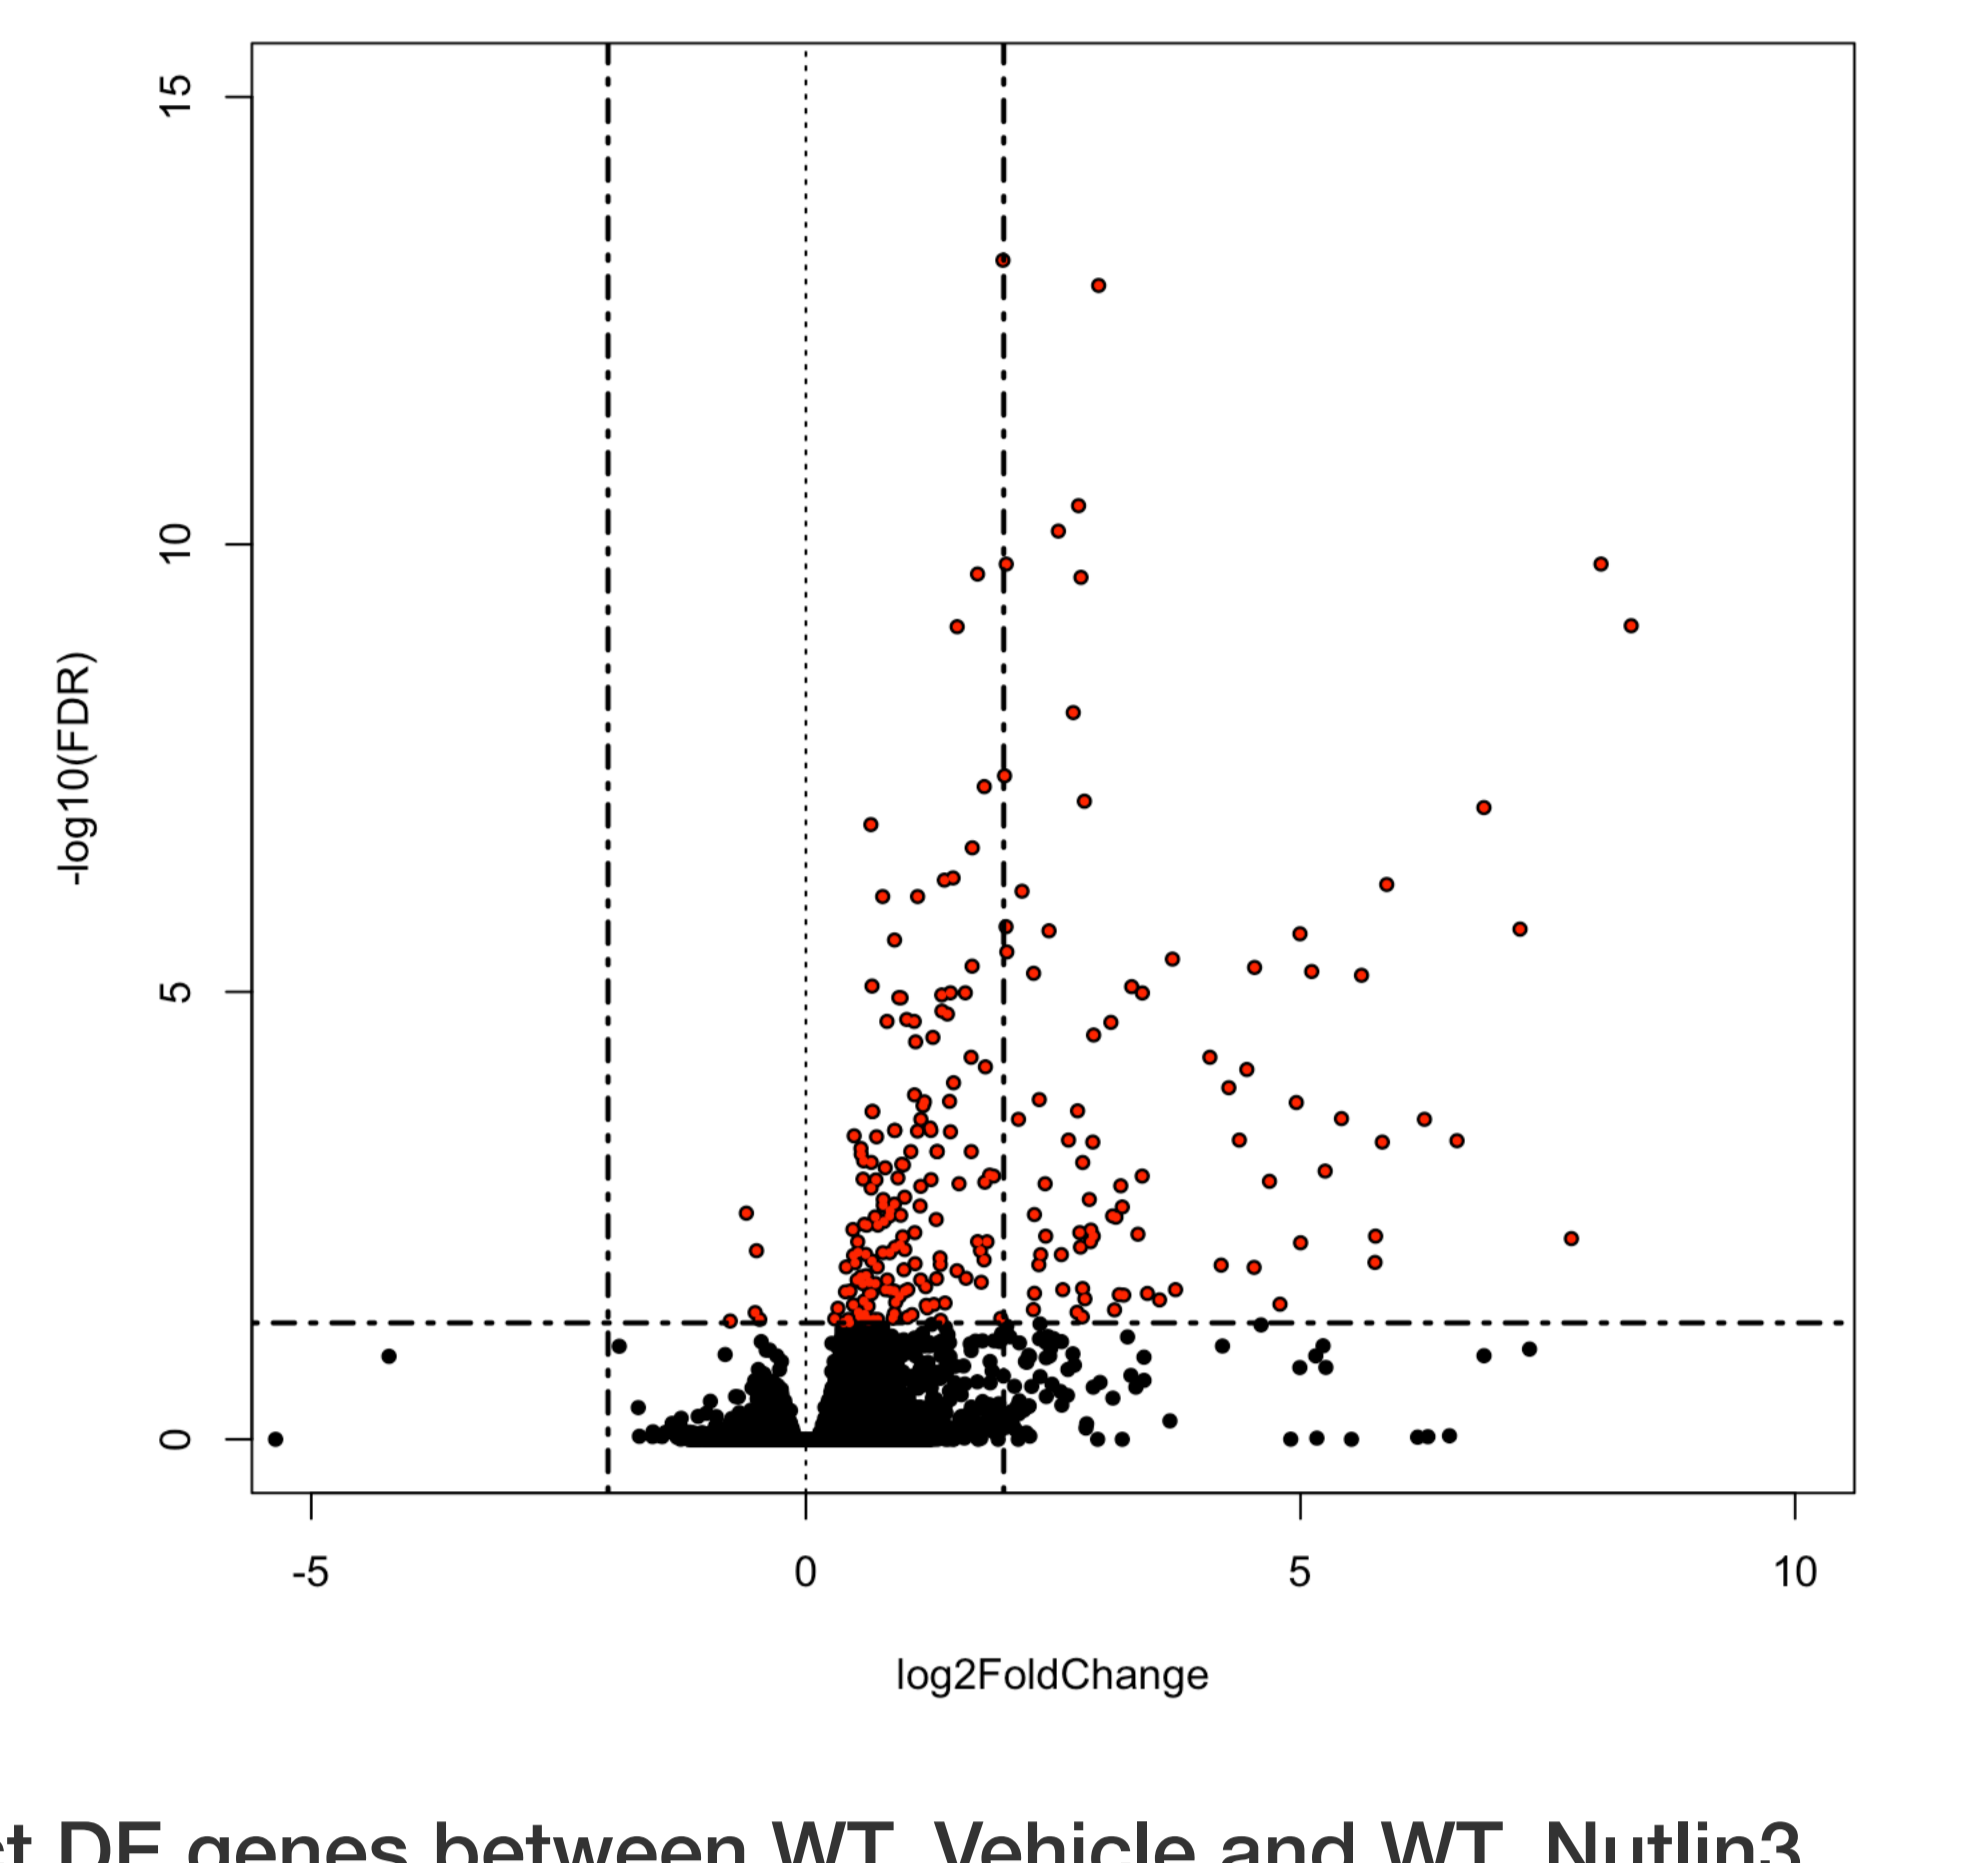

## Detect DE genes between WT\_Vehicle and WT\_Nutlin3

```
subset2_idx=(as.character(type=="wildtype"))
dds_2 <- DESeqDataSetFromMatrix(countData = counts[,subset2_idx],
                                coldata = coldata[,subset2_idx],
                                design = ~ condition)

dds_2 <- DESeq(dds_2)
res_2 <- results(dds_2)
summary(res_2) #up: 0%, down: 0%
```

```
## out of 22585 with nonzero total read count
## adjusted p-value < 0.1
## LFC > 0 (up) : 0, 0%
## LFC < 0 (down) : 0, 0%
## outliers [1] : 43, 0.19%
## low counts [2] : 0, 0%
## (mean count < 8)
## [1] see 'cooksCutoff' argument of ?results
## [2] see 'independentFiltering' argument of ?results
```

```
# Result is stored in "resOrdered2"
resOrdered2=res_2[order(res_2$padj),]
#write.csv(as.data.frame(resOrdered2), file="Veh_vs_Nut(WT).csv") # this line is to write result into .csv file
#resLFC_2 <- lfcShrink(dds_2, coef="condition_Nutlin_3_vs_Vehicle", type="apeglm")
#resLFC_2

# check the first 5 lines of result
head(resOrdered2)
```

```
## log2 fold change (MLE): condition Nutlin 3 vs Vehicle
## Wald test p-value: condition Nutlin 3 vs Vehicle
## DataFrame with 6 rows and 6 columns
## baseMean log2FoldChange lfcSE stat pvalue
## <numeric> <numeric> <numeric> <numeric> <numeric>
## ENSMUSG0000041323 93.326905 0.927672 0.2420101 3.833195 1.26489e-04
## ENSMUSG0000027562 3187.001430 0.264813 0.0679988 3.896669 9.75246e-05
## ENSMUSG0000022554 4702.427265 0.244786 0.0896721 3.864564 1.20570e-04
## ENSMUSG0000049353 13.769472 2.849383 0.7598489 3.749934 1.76881e-04
## ENSMUSG00000012498 1.819579 3.176697 1.9762573 1.607431 1.07960e-01
## ENSMUSG0000028825 0.890638 1.929234 2.6662274 0.723582 4.69323e-01
```

```
## padj
## <numeric>
## ENSMUSG0000041323 0.950441
## ENSMUSG0000027562 0.950441
## ENSMUSG0000022554 0.950441
## ENSMUSG0000049353 0.996815
## ENSMUSG0000012498 0.999899
## ENSMUSG0000028825 0.999899
```

```
plot(res_2$log2FoldChange, -log10(res_2$padj),pch=20,
      xlab = "log2FoldChange",
      ylab = "-log10(FDR)",
      xlim = c(-10,10))

#with(subset(res_2, padj<0.05 & abs(log2FoldChange)>2), points(log2FoldChange, -log10(padj), pch=20, col="red", cex=0.5))
with(subset(res_2, padj<0.05), points(log2FoldChange, -log10(padj), pch=20, col="red", cex=0.5))

#Add lines for absolute FC>2 and FDR <0.05
abline(v=0, col="black", lty=3, lwd=1.0)
abline(v=-2, col="black", lty=4, lwd=2.0)
abline(v=2, col="black", lty=4, lwd=2.0)
abline(h=-log10(0.05), col="black", lty=4, lwd=2.0)
```

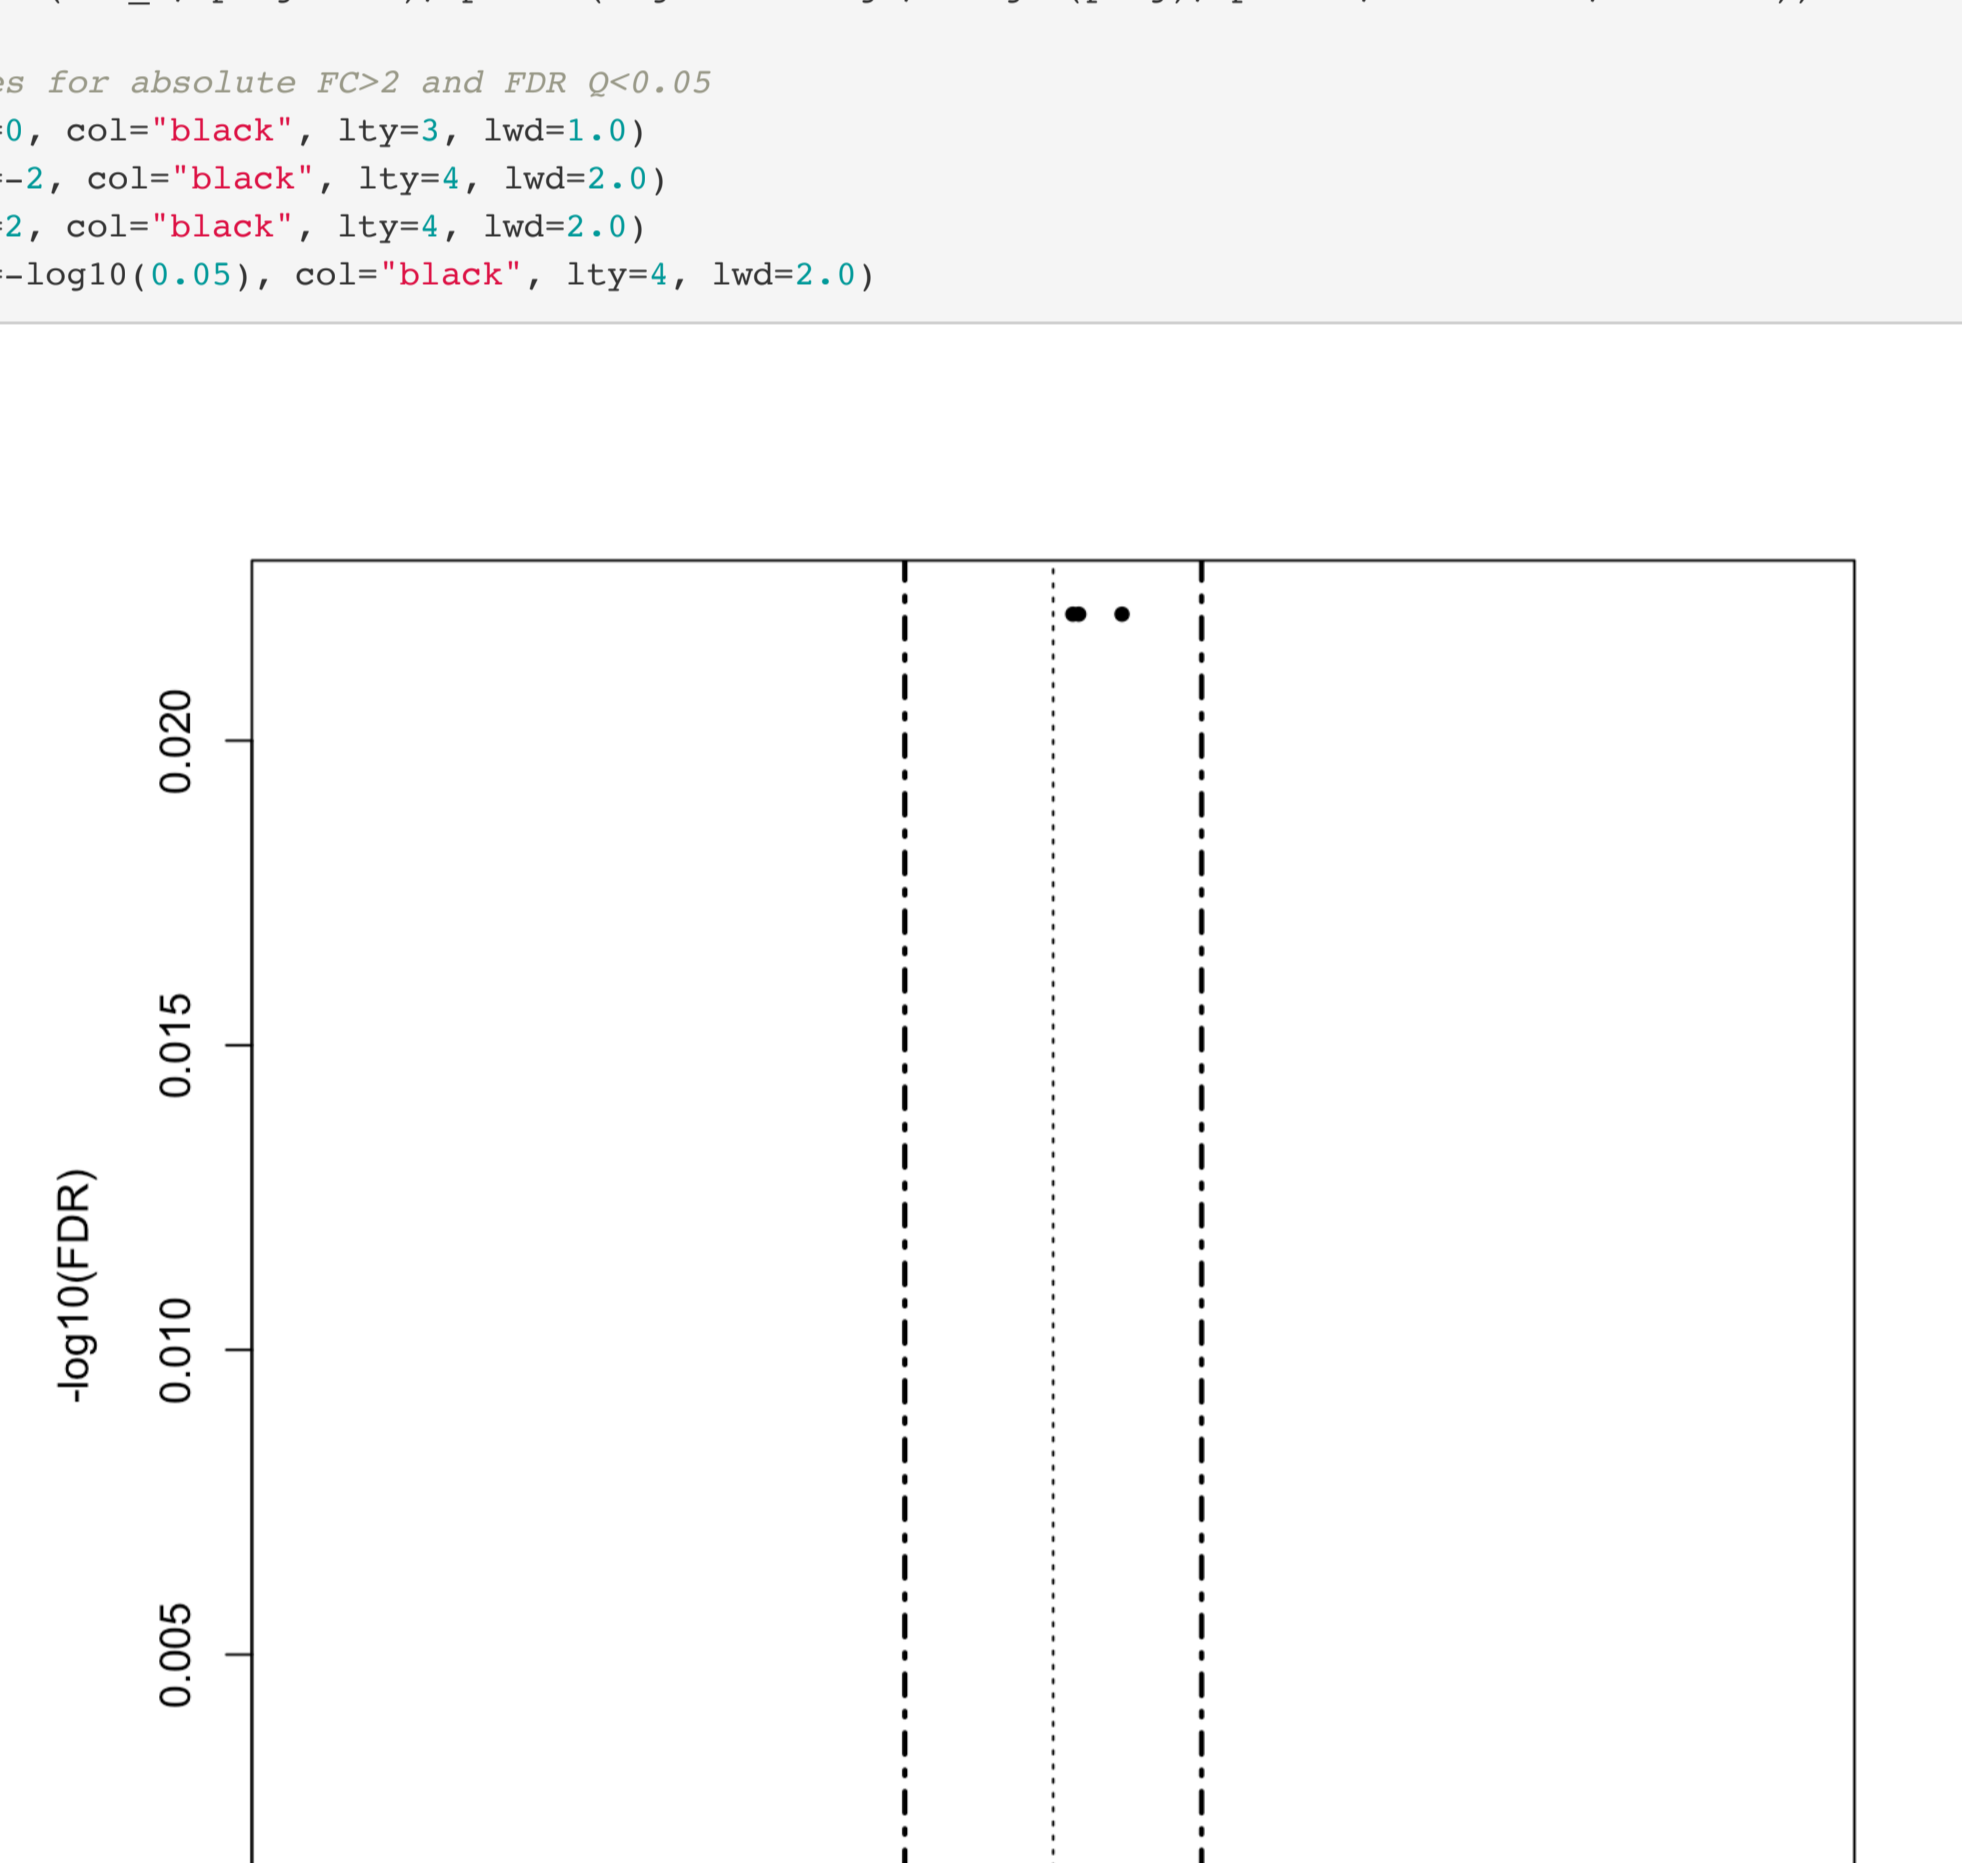

## Detect DE genes between WT\_Vehicle and KO\_Vehicle

```
subset3_idx=(as.character(condition=="Vehicle"))
dds_3 <- DESeqDataSetFromMatrix(countData = counts[,subset3_idx],
                                coldata = coldata[,subset3_idx],
                                design = ~ type)

dds_3 <- DESeq(dds_3)
res_3 <- results(dds_3)
summary(res_3) #up: 0.049%, down: 0.089%
```

```
## out of 22578 with nonzero total read count
## adjusted p-value < 0.1
## LFC > 0 (up) : 11, 0.049%
## LFC < 0 (down) : 20, 0.089%
## outliers [1] : 16, 0.071%
## low counts [2] : 0, 0%
## (mean count < 8)
## [1] see 'cooksCutoff' argument of ?results
## [2] see 'independentFiltering' argument of ?results
```

```
# Result is stored in "resOrdered3"
resOrdered3=res_3[order(res_3$padj),]
#write.csv(as.data.frame(resOrdered3), file="WT_vs_KO(Veh).csv") # this line is to write result into .csv file
#resLFC_3 <- lfcShrink(dds_3, coef="type_knock_out_vs_wildtype", type="apeglm")
#resLFC_3

# check the first 5 lines of result
head(resOrdered3)
```

```
## log2 fold change (MLE): type knock out vs wildtype
## Wald test p-value: type knock out vs wildtype
## DataFrame with 6 rows and 6 columns
## baseMean log2FoldChange lfcSE stat pvalue
## <numeric> <numeric> <numeric> <numeric> <numeric>
## ENSMUSG0000000838 1017.144 -1.179192 0.0860293 -13.70687 9.23581e-43
## ENSMUSG0000095562 109.370 7.039586 0.6749312 10.43908 1.80737e-25
## ENSMUSG0000026837 433.304 -0.995107 0.1366851 -7.28029 3.33109e-13
## ENSMUSG0000039474 2023.626 -0.437512 0.0738995 -5.91316 3.5596e-09
## ENSMUSG0000024793 880.178 0.675892 0.1192620 5.66729 1.45073e-08
## ENSMUSG0000041444 3351.765 -0.307535 0.0577925 -5.32137 1.02987e-07
```

```
## padj
## <numeric>
## ENSMUSG0000000838 2.08378e-38
## ENSMUSG0000095562 2.03890e-21
## ENSMUSG0000026837 2.50520e-09
## ENSMUSG0000039474 1.89293e-05
## ENSMUSG0000024793 6.54627e-05
## ENSMUSG0000041444 3.87265e-04
```

```
plot(res_3$log2FoldChange, -log10(res_3$padj),pch=20, xlim=c(-8,8),
      xlab = "log2FoldChange",
      ylab = "-log10(FDR)")

#with(subset(res_3, padj<0.05 & abs(log2FoldChange)>2), points(log2FoldChange, -log10(padj), pch=20, col="red", cex=0.5))
with(subset(res_3, padj<0.05), points(log2FoldChange, -log10(padj), pch=20, col="red", cex=0.5))

#Add lines for absolute FC>2 and FDR <0.05
abline(v=0, col="black", lty=3, lwd=1.0)
abline(v=-2, col="black", lty=4, lwd=2.0)
abline(v=2, col="black", lty=4, lwd=2.0)
abline(h=-log10(0.05), col="black", lty=4, lwd=2.0)
```

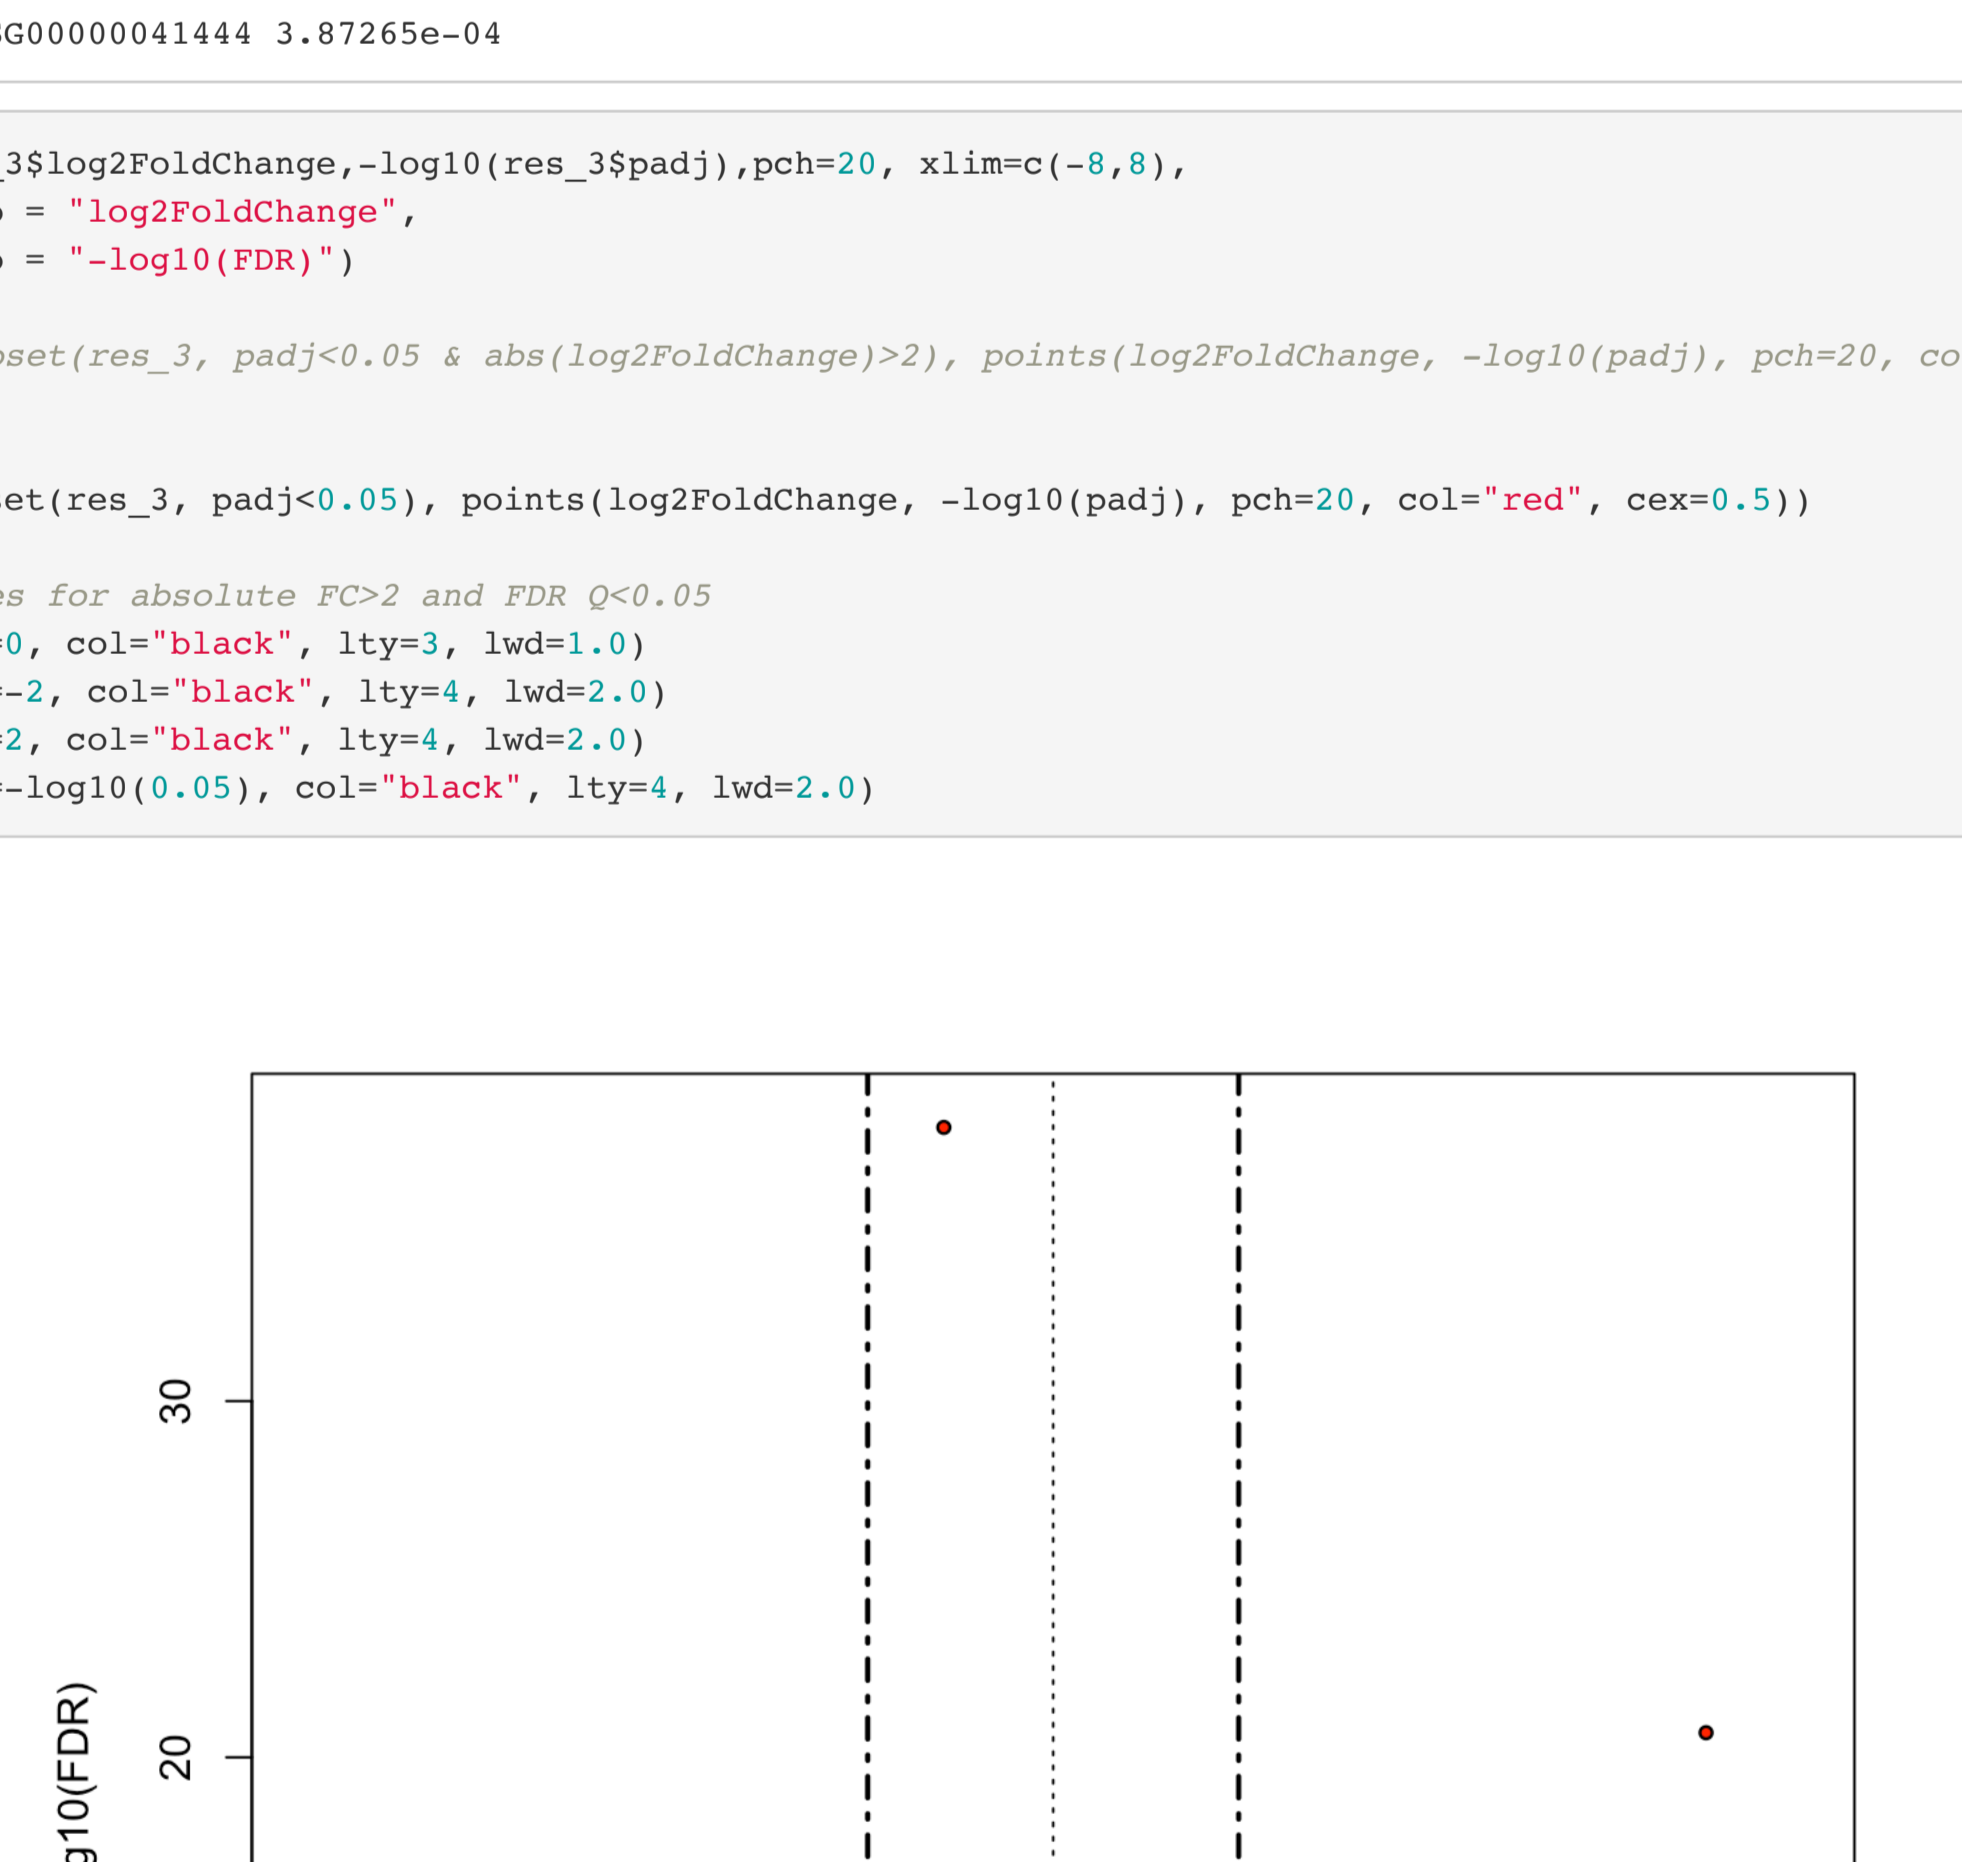

## Detect DE genes between WT\_Vehicle and KO\_Nutlin

```
subset4_idx=c("1",3,10,11)
con = c(rep("WV",3),rep("KN",3))
con = factor(con,levels = c("KN","WV"))
dds_4 <- DESeqDataSetFromMatrix(countData = counts[,subset4_idx],
                                coldata = data.frame(con=con),
                                design = ~ con)

dds_4 <- DESeq(dds_4)
res_4 <- results(dds_4)
summary(res_4) #up: 0.19%, down: 1.2%
```

```
## out of 22591 with nonzero total read count
## adjusted p-value < 0.1
## LFC > 0 (up) : 32, 0.19%
## LFC < 0 (down) : 282, 1.2%
## outliers [1] : 16, 0.071%
## low counts [2] : 2627, 12%
## (mean count < 4)
## [1] see 'cooksCutoff' argument of ?results
## [2] see 'independentFiltering' argument of ?results
```

```
# Result is stored in "resOrdered4"
resOrdered4=res_4[order(res_4$padj),]
#write.csv(as.data.frame(resOrdered4), file="KNut_vs_WV(Veh).csv") # this line is to write result into .csv file
#resLFC_4 <- lfcShrink(dds_4, coef="con_WV_vs_KN", type="apeglm")
#resLFC_4

# check the first 5 lines of result
head(resOrdered4)
```

```
## log2 fold change (MLE): con WV vs KN
## Wald test p-value: con WV vs KN
## DataFrame with 6 rows and 6 columns
## baseMean log2FoldChange lfcSE stat pvalue
## <numeric> <numeric> <numeric> <numeric> <numeric>
## ENSMUSG0000000838 985.054 1.298570 0.110185 11.78537 4.64357e-32
## ENSMUSG0000068323 214.185 -8.022474 0.803928 -9.97910 1.88169e-23
## ENSMUSG0000001808 13018.651 -8.545720 0.961921 -8.88401 6.44909e-19
## ENSMUSG0000048108 376.376 -7.719960 1.133667 -6.80972 9.78770e-12
## ENSMUSG0000027962 502.579 -0.854853 0.127393 -6.71037 1.94132e-11
## ENSMUSG0000025350 102.957 -2.643986 0.395930 -6.67791 2.42372e-11
```

```
## padj
## <numeric>
## ENSMUSG0000000838 9.25741e-28
## ENSMUSG0000068323 1.87567e-19
## ENSMUSG0000001808 4.28564e-15
## ENSMUSG0000048108 1.87390e-08
## ENSMUSG0000027962 7.74040e-08
## ENSMUSG0000025350 8.05323e-08
```

```
plot(res_4$log2FoldChange, -log10(res_4$padj),pch=20, xlim=c(-12,10),
      xlab = "log2FoldChange",
      ylab = "-log10(FDR)")

#with(subset(res_4, padj<0.05 & abs(log2FoldChange)>2), points(log2FoldChange, -log10(padj), pch=20, col="red", cex=0.5))
with(subset(res_4, padj<0.05), points(log2FoldChange, -log10(padj), pch=20, col="red", cex=0.5))

#Add lines for absolute FC>2 and FDR <0.05
abline(v=0, col="black", lty=3, lwd=1.0)
abline(v=-2, col="black", lty=4, lwd=2.0)
abline(v=2, col="black", lty=4, lwd=2.0)
abline(h=-log10(0.05), col="black", lty=4, lwd=2.0)
```

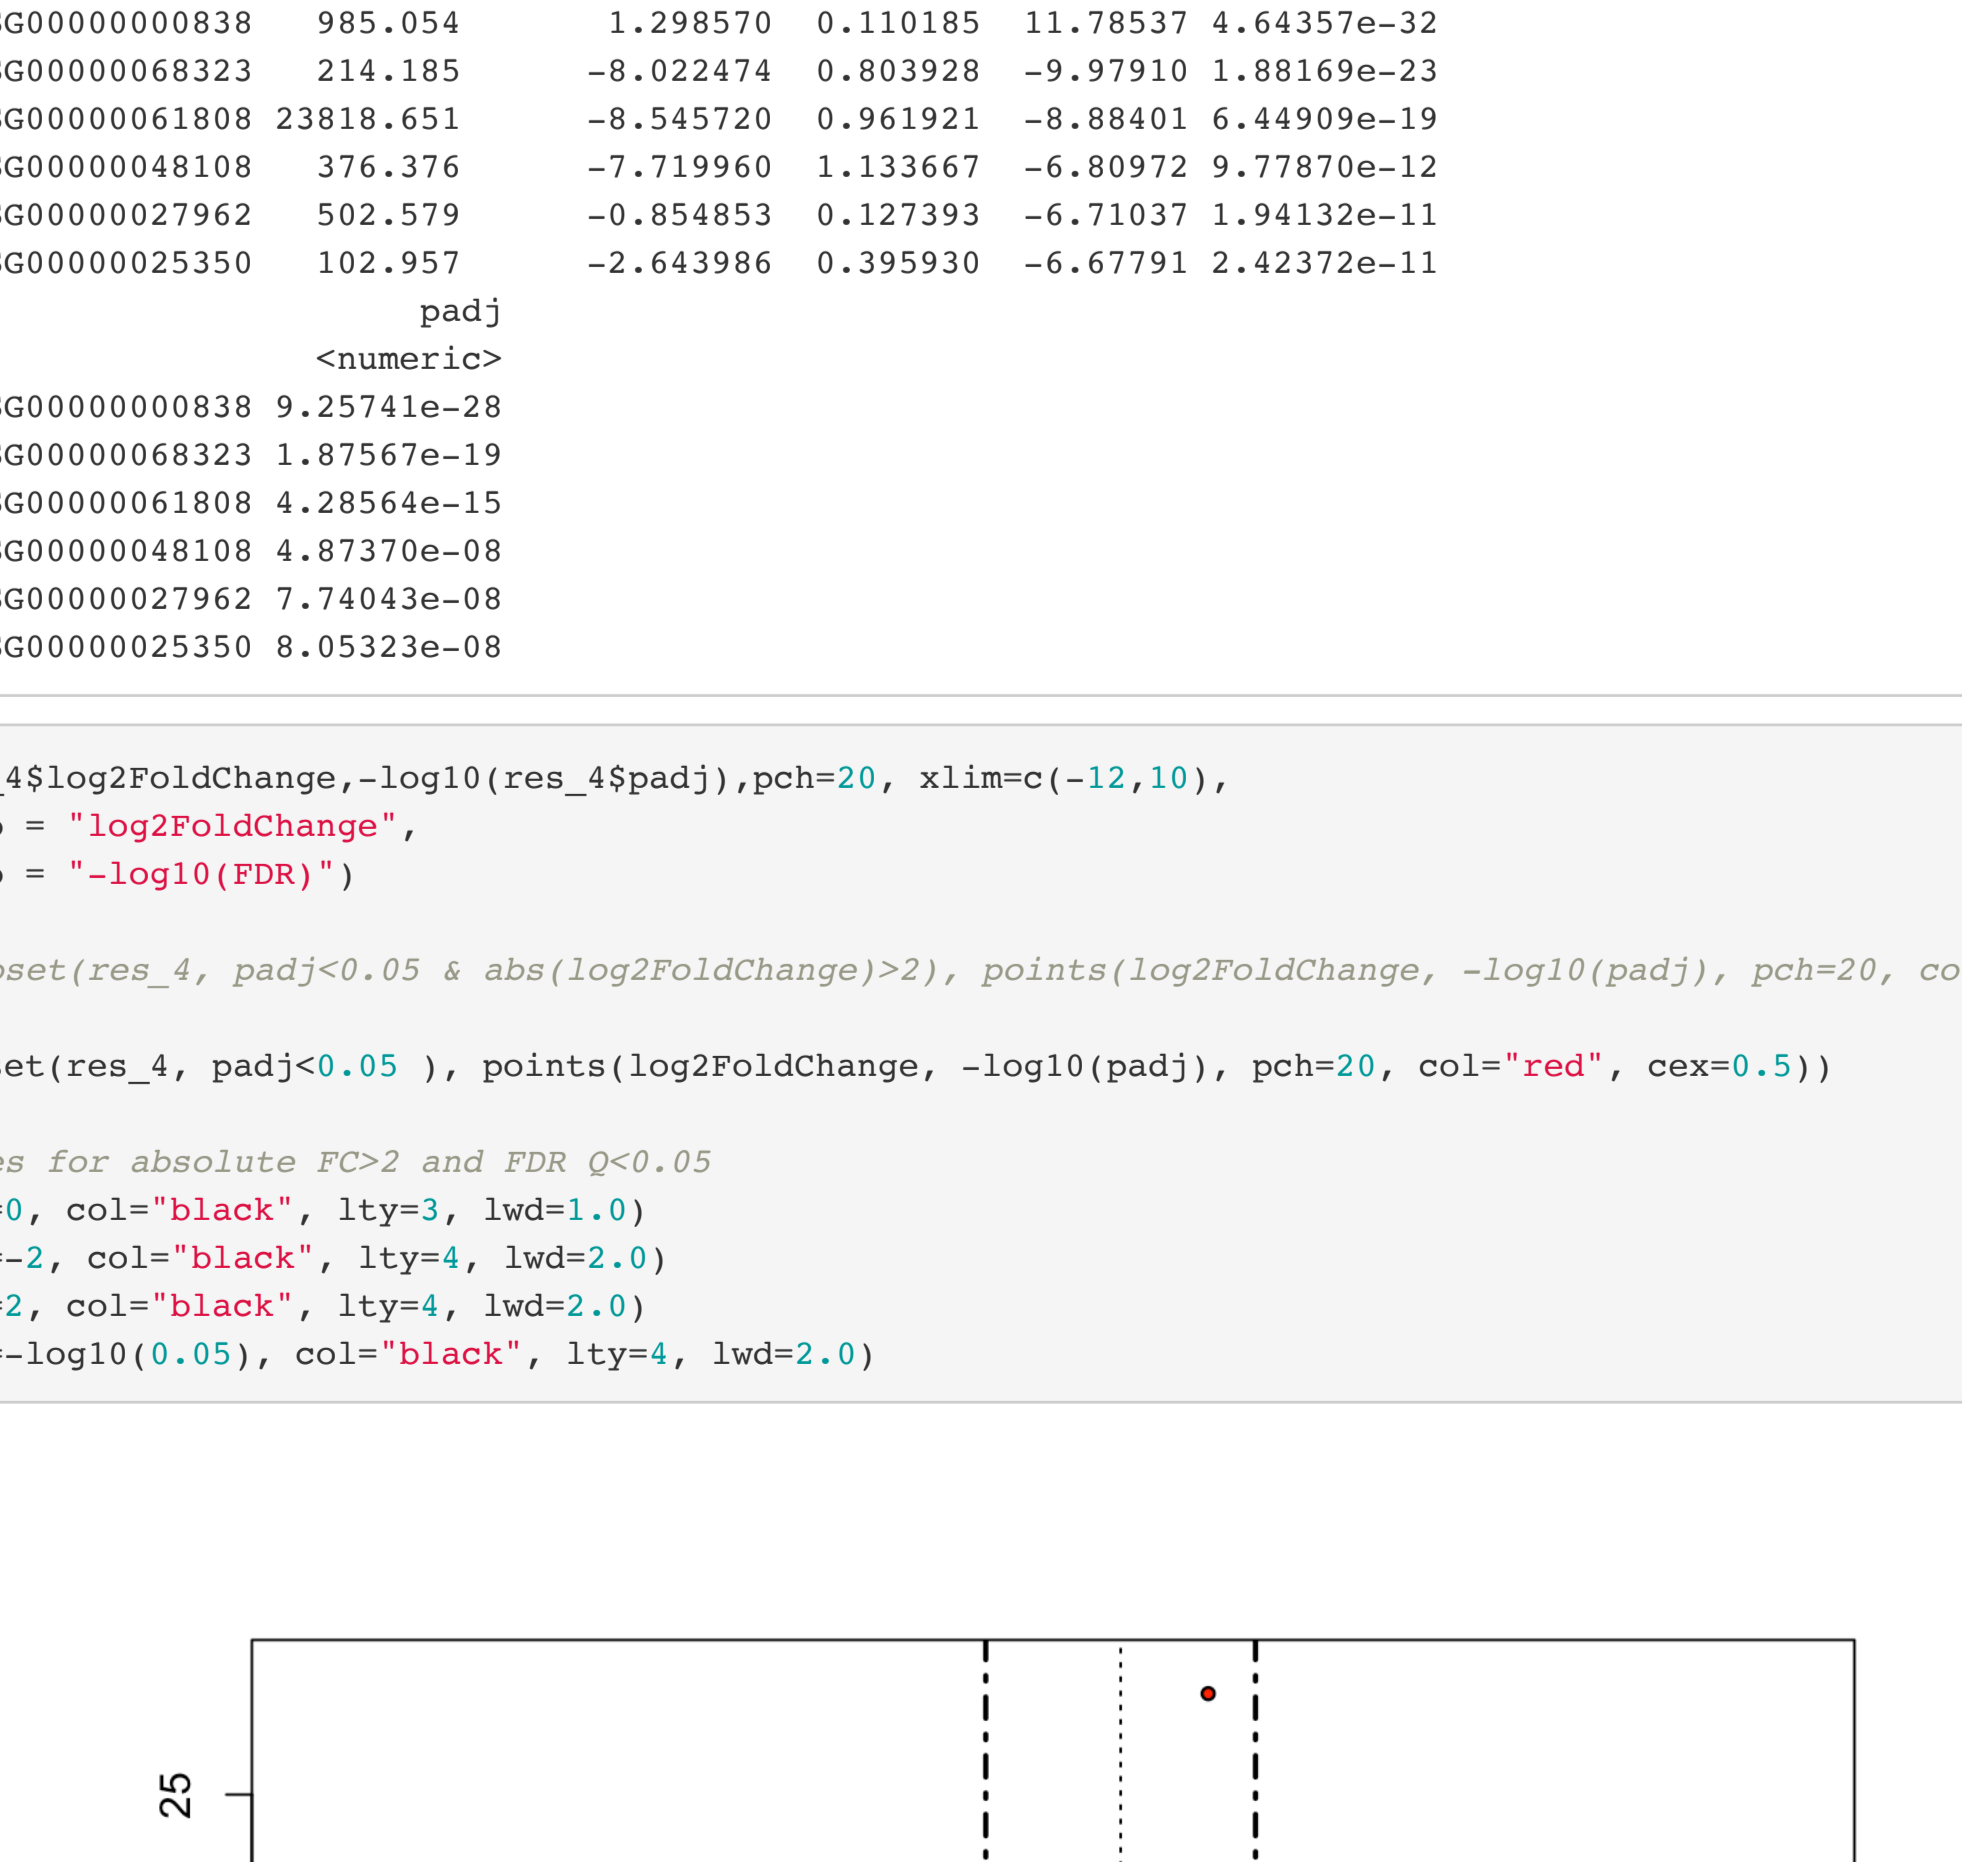

Supplement: MOESM3 [file 20400172]
