# Supplementary material for: Sustained correction of hippocampal neurogenic and cognitive deficits after a brief treatment by Nutlin-3 in a mouse model of fragile X syndrome
Source: Springer Nature journal article supplement (doi:10.1186/s12916-022-02370-9), 2022-05-12
Supplement: MOESM2 [file 20400172]

## STAR alignment parameters

```
##### Final user re-defined parameters-----:
runThreadN                4
readFilesCommand          zcat
outSAMtype                 BAM   SortedByCoordinate
outSAMattributes          NH   HI   AS   NM   MD
outSAMunmapped            Within
outFilterType             BySJout
quantMode                  TranscriptomeSAM  GeneCounts
twopassMode               Basic
```
